# Supplementary material for: Fate mapping analysis reveals a novel murine dermal migratory Langerhans-like cell population
Source: eLife. 2021 Mar 26;10:e65412. doi: 10.7554/eLife.65412 (PMC8110305; doi:10.7554/eLife.65412)
Supplement: Figure 4—source data 1. [file elife-65412-fig4-data1.xlsx]

## Sheet: Fig. 4F epi+dermis
microglia	LC	LC	LClike	cDC1	CD11bhi	TN
43	17.8	15.6	5.43	6.8	7.2	3.5
51	6.5	9.84	5	6.58	4.61	7
27	13	7.89	1.5	2.34	0.6	4.23
31	8	7.34	4.1	3.3	3.26	0.53

## Sheet: Fig. 4F LN
LClike	cDC1	CD11bhi	TN	cDC1	CD11bhi	TN
1.18	5.61	4.19	2.64	6.03	9	6.1
0.21	1.27	1.1	0.46	0.72	2.73	0.83
1.5	2	2	2.6	1.5	3.95	2.5
4.7	3.5	3	3.4	2.5	2.2	0.9
3.3	3.5	3.5	3.5	4	4.35	6
