# Supplementary material for: Fate mapping analysis reveals a novel murine dermal migratory Langerhans-like cell population
Source: eLife. 2021 Mar 26;10:e65412. doi: 10.7554/eLife.65412 (PMC8110305; doi:10.7554/eLife.65412)
Supplement: Figure 5—source data 1. [file elife-65412-fig5-data1.xlsx]

## Sheet: Fig. 5C epi
	1 M										4 M
LC	0	0	0	0	0	0.985					3.65	1.3	0.731	0.115	0	0.643

## Sheet: Fig. 5C Dermis
	1 M										4 M
LC	0	0	0	0	0	0					0	0	0	0	0	12.5
cDC1	93.3	85.7	100	96	94.9	96					89.3	91.6	96.6	91.7	87.9	93.5
TN	89.4	88.1	83	79.1	87	91.7					97.9	96.2	99.8	99.5	99.5	99.8
LClike	11.1	25	14.3	17.4	15.4	10.5					23.7	56	53.1	46.5	42.9	53.6
CD11bhi	100	99.4	99.8	99.8	98.7	99.5					96.9	97.8	99.4	99.2	100	100

## Sheet: Fig. 5C SLN
	1 M																		4 M
LC
cDC1	94.2	93.2	94	94.8	95.7	95.5													93.1	89.9	97.7	97.2	97.9	96.1
TN	95.1	95.6	97.9	96.9	97.4	97.3													96	93.6	97.3	97.6	96.2	95.4
LClike	14.3	14.2	11.1	10.7	5.26	6.33													43.8	44	43.5	48	43.6	43.4
CD11bhi	93	94.1	96.8	93.8	93.2	93.1													95.9	95.9	98.5	99	97.6	97.1
