# Supplementary material for: Fate mapping analysis reveals a novel murine dermal migratory Langerhans-like cell population
Source: eLife. 2021 Mar 26;10:e65412. doi: 10.7554/eLife.65412 (PMC8110305; doi:10.7554/eLife.65412)
Supplement: Figure 6—source data 1. — Values have been normalized to cDC1 YFP labelling. [file elife-65412-fig6-data1.xlsx]

## Sheet: Fig. 6C epidermis
	LC
1	1.62	5.15	4.31	5.19	8	3.85
4	2.6	3.99	2.27	2.31	7.83	6.08
8	11.09	5.65	6.69	5.71	2.31	0.42

## Sheet: Fig. 6C dermis
	cDC1															LClike															TN															CD11bhi
1	100	100	100	100	100	100										21.3834	20	33.2117	18.1482	0	0										78.6561	109.5	90.5109	101.852	92.1212	73.0769										92.0949	119.5	125.547	105.556
4	100	100	100	100	100	100										48.15	50.99	28.59	51.36	41.11	41.61										88.74	96.53	49.79	73.91	70	93.71										107.95	115.35	68.46	92.93
8	100	100	100	100	100	100										60.3399	9.21635	72.9252	73.1788	62.3066	89.5652										66.4306	62.0102	89.932	83.7748	71.0267	110.435										95.0425	113.629	99.7279	95.5298
[truncated: 8 more columns]

## Sheet: Fig. 6C LN
	cDC1												LClike												TN												CD11bhi
1	100	100	100	100	100	100							18.9835	19.6667	7.44538	6.64615	16.9173	13.022							129.67	67.4167	79.3277	107.692	64.7368	84.0659							91.7582	75.5	73.3613	104.462	92.4812	84.6154
4	100	100	100	100	100	100							21.26	28.86	47.8	43.24	28.83	52.12							97.13	89.02	91.19	88.7	94.13	110.81							91.95	99.62	85.53	91.65	102.05	111.58
8	100	100	100	100	100	100							96.6208	70.7908	76.3081	50.8389	93.9744	56.9768							96.8711	98.9796	99.564	93.6242	95.7692	102.326							98.6233	100.383	102.762	98.6577	94.4872	98.4496
