# Supplementary material for: Fate mapping analysis reveals a novel murine dermal migratory Langerhans-like cell population
Source: eLife. 2021 Mar 26;10:e65412. doi: 10.7554/eLife.65412 (PMC8110305; doi:10.7554/eLife.65412)
Supplement: Figure 7—source data 1. [file elife-65412-fig7-data1.xlsx]

## Sheet: Fig. 7C epidermis
w/o DT	short DT	long DT
7.2	0.053	0.335
7.249	0.057	0.19
0.786	0.054	0.283
3.317	0.07	0.247
2.827	0.192	0.211
3.338	0.26	0.175
3.468	0.21	0.19
3.463	0.15	0.242

## Sheet: Fig. 7C dermis LC
w/o DT	short DT	long DT
0.19	0.001	0.007
0.167	0.001	0.009
0.206	0.001	0.015
0.183	0.007	0.019
0.298	0.005	0.006
0.53	0.008	0.008
0.1	0.005	0.069
0.086	0.011	0.12

## Sheet: Fig. 7C dermis LC like
w/o DT	short DT	long DT
0.145	0.218	0.138
0.115	0.102	0.159
0.112	0.163	0.13
0.034	0.242	0.133
0.119	0.147	0.136
0.271	0.146	0.183
0.301	0.2	0.166
0.524	0.123	0.212

## Sheet: Fig. 7C dermis cDC1
w/o DT	short DT	long DT
0.34	0.226	0.369
0.059	0.251	0.23
0.236	0.244	0.151
0.138	0.22	0.283
0.27	0.143	0.121
0.142	0.397	0.209
0.477	0.453	0.625
0.573	0.3	0.963

## Sheet: Fig. 7C dermis CD11bhi
w/o DT	short DT	long DT
6.182	0.363	3.546
6.22	0.18	1.872
10.269	0.833	1.109
6.921	3.51	2.4
10.188	3.027	1.579
8	3.039	1.558
7.2	3.695	0.607
8.1	4.544	1.552

## Sheet: Fig. 7C dermis TN
w/o DT	short DT	long DT
0.464	0.065	1.313
0.075	0.049	0.793
0.182	0.127	0.425
0.074	0.092	1.112
0.157	0.109	0.769
0.232	0.135	0.912
0.96	0.139	0.723
0.897	1.893	1.072

## Sheet: Fig. 7C LN LC like
w/o DT	short DT	long DT
1.626	2.91	2.034
1.702	2.662	1.94
0.552	2.536	1.858
0.681	3.038	1.981
1.898	0.759	2.304
1.432	0.611	2.216
1.896	0.656	1.504
1.193	0.452	1.487
3.211	1.64	1.322
1.82	1.256	1.39

## Sheet: Fig. 7C LN cDC1
w/o DT	short DT	long DT
3.903	1.842	2.555
3.762	2.152	2.394
1.289	1.72	2.237
1.532	2.146	2.255
4.945	2.928	2.865
4.557	2.348	2.833
4.428	3.543	2.26
4.002	2.075	2.232
2.899	2.1	1.71
2.485	2.4	1.664

## Sheet: Fig. 7C LN CD11bhi
w/o DT	short DT	long DT
5.591	2.394	3.334
5.84	1.45	3.022
2.121	5.938	3.746
2.276	1.774	3.7
3.277	0.459	3.449
3.284	1.171	3.319
3.862	0.46	2.813
3.324	0.288	2.703
7.036	0.688	2.74
6.728	0.538	2.784

## Sheet: Fig. 7C LD TN
w/o DT	short DT	long DT
3.997	1.068	2.995
3.972	1.492	2.905
1.413	1.952	2.648
1.493	0.974	2.552
1.41	1	3.167
1.448	1.3	3.162
2.316	1.2	2.809
1.521	1.8	2.773
7.686	1.7	2.477
1.902	1.5	2.458

[truncated: 3 more sheets: Fig. 7 F epidermis, Fig. 7F dermis, Fig. 7F LN]
