# Supplementary material for: Fate mapping analysis reveals a novel murine dermal migratory Langerhans-like cell population
Source: eLife. 2021 Mar 26;10:e65412. doi: 10.7554/eLife.65412 (PMC8110305; doi:10.7554/eLife.65412)
Supplement: Figure 8—source data 1. [file elife-65412-fig8-data1.xlsx]

## Sheet: Fig. 8 B 
	WT					DC-SIGN
0	0	0	0	0		0	0	0
1	99	121	107	106		120	166	128
2	156	172	139	137		193	200	174
3	140	186	143	165		217	217	189
4	120	136	84	177		193	147	192
5	43	84	78	128		160	140	188
6	44	72	69	98		123	99	122
7	26	42	40	62		90	75	77
8	3	16	15	34		44	45	48
12	3	6	9	2		8	7	17

## Sheet: Fig. 8C 
IL-1b			IL-6			TNF-a			IFNg			VEGFA
WT	DC-SIGN		WT	DC-SIGN		WT	DC-SIGN		WT	DC-SIGN		WT	DC-SIGN
0.802941	4.01756		0.847694	13.7113		0.785371	6.79622		0.846887	1.51098		0.802941	4.01756
1.11487	3.671		1.02832	14.3495		0.901717	8.24465		0.994917	1.80207		1.11487	3.671
1.08219	3.42106		1.12399	15.3078		1.31291	7.31494		1.1582	1.49821		1.08219	3.42106

## Sheet: Fig. 8D 
FOXP3 dermis			CD8+IFNg+ dermis
WT	DC-SIGN		WT	DC-SIGN
56	35		47	81
54	85		40	88
82	66		57	55.4
81	60		48	81.7

## Sheet: Fig. 8F
Day	WT+AOO+DNFB										WT+DNTB+DNFB										Langerin-DTR+DNTB+DNFB										Clec9A-DTR+DNTB+DNFB										DC-SIGN DTR+DNTB+DNFB
0	0	0	0	0	0	0	0	0	0	0	0	0	0	0	0	0					0	0	0	0	0	0					0	0	0	0	0	0					0	0	0	0	0	0
1	75	95	80	85	130	78	59	68	74	71	28	32	27	40	30	36					106	95	146	41	41	51					18	51	30	31	19	61					32	25	37	29	46	44
2	81	98	95	86	137	86	114	108	85	92	48	42	29	57	39	52					165	139	156	61	61	62					23	61	35	75	42	72					42	36	72	37	50	48
3	120	115	135	105	139	100	124	128	104	121	57	60	67	65	58	66					176	140	186	92	92	83					33	82	35	80	49	83					55	50	78	51	75	73
4	70	75	62	60	119	75	56	42	69	81	33	25	17	39	30	31					90	62	137	37	37	48					17	48	24	59	36	48					30	20	30	27	31	29
5	19	45	21	56	93	55	44	28	11	26	23	10	2	28	17	20					48	49	51	21	21	37					9	19	16	29	24	37					17	15	18	17	22	20
6	4	5	9	15	19	15	28	13	6	24	13	8	3	15	12	17					39	25	26	12	12	28					5	13	10	13	14	18					7	5	2	2	13	11

## Sheet: Fig. 8G ICOS+ Tregs
WT + AOO + DNFB	WT + DNTB + DNFB	CD207-DTR + DNTB + DNFB	Clec9A-DTR + DNTB + DNFB	DC-SIGN-DTR + DNTB + DNFB
30.8	51.6	25.1	55	51
29.3	59.4	37	40.1	49.9
25.9	49.2	36.8	53.6	48
29	55	28.6	49.7	52.2
34.2	37.9	37.3	40.8	48.4
32.8	51.8	35.1	39.1	47.3

## Sheet: Fig. 8H CD8+
WT+AOO+DNFB	WT+DNTB+DNFB	CD207-DTR+DNTB+DNFB	Clec9A-DTR+DNTB+DNFB	DC-SIGN DTR+DNTB+DNFB
42.3	17.9	33.5	13.3	18.6
32.5	15.8	30.2	14.8	19.5
32.1	15.6	37.6	15.6	16.2
31	15.6	35.4	13	15.9
33.2	15	35.7	15.9	15.6
35.7	18.7	36.3	14.8	19.8
