# Supplementary material for: Fate mapping analysis reveals a novel murine dermal migratory Langerhans-like cell population
Source: eLife journal article supplement (doi:10.7554/elife.65412), 2021-03-26
Supplement: supp [file elife-65412-supp-v1.zip]

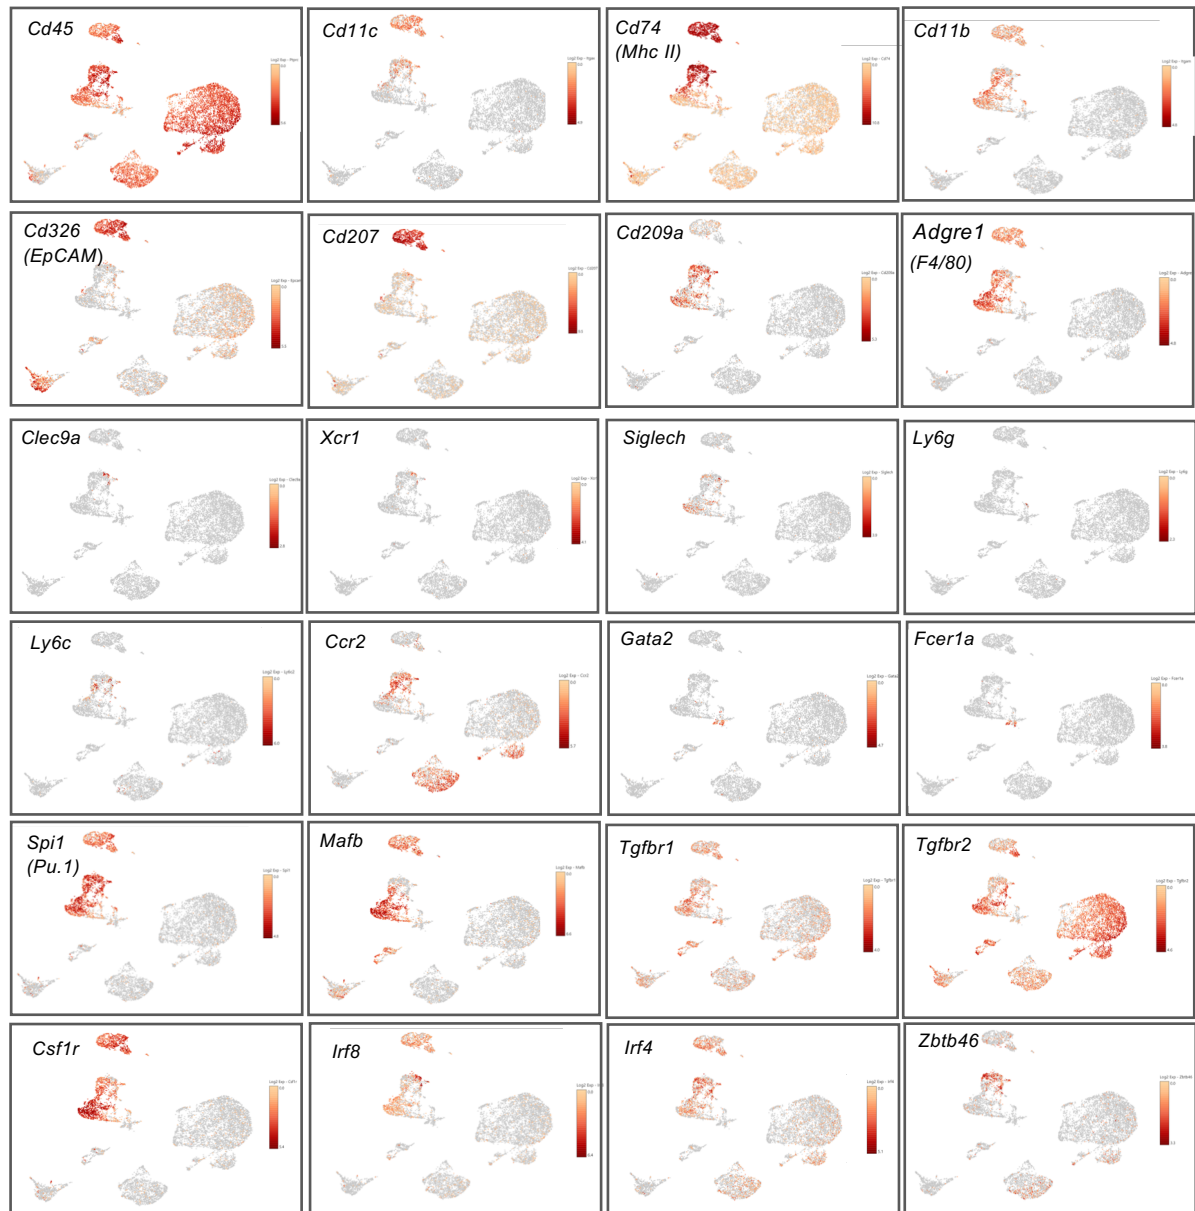

**Fig. 2- Figure supplement 1:** Analysis of scRNAseq data from murine dermis. UMAP plots showing the expression of indicated prototypical myeloid genes.
