# Supplementary figures and images for: Fate mapping analysis reveals a novel murine dermal migratory Langerhans-like cell population
Source: eLife journal article supplement (doi:10.7554/elife.65412), 2021-03-26

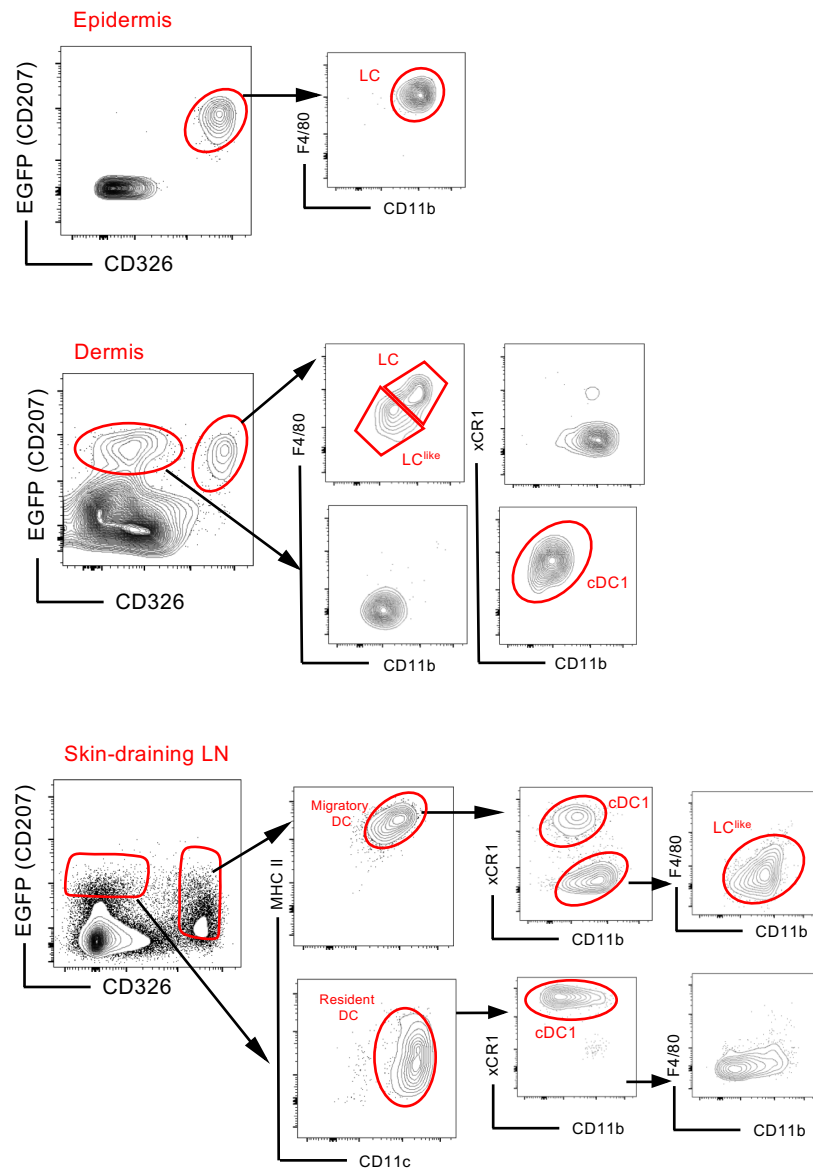

Fig. 1 – Figure supplement 2

Supplement: supp [file elife-65412-supp-v1.zip]

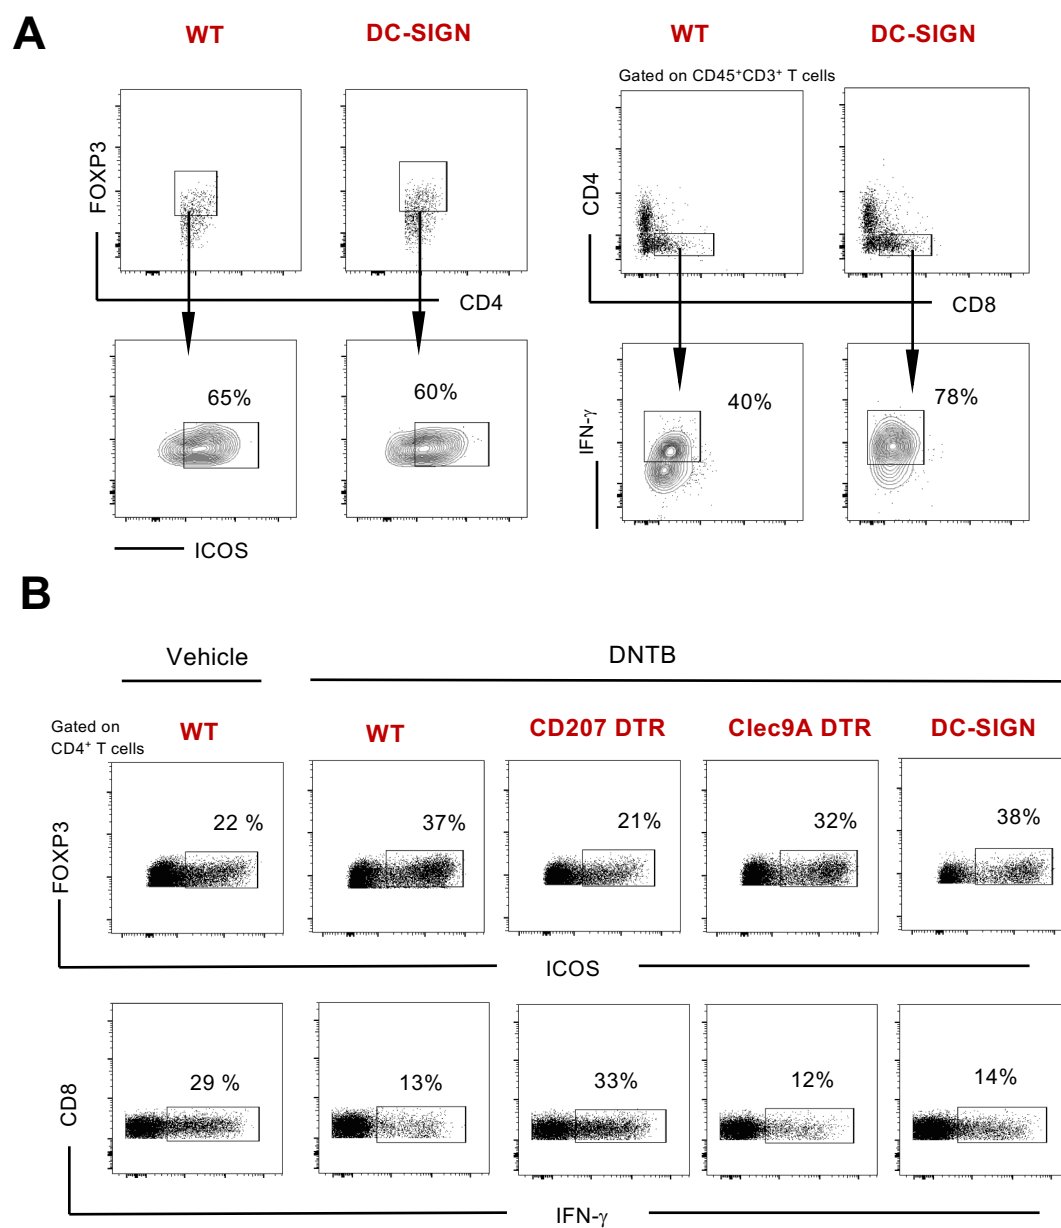

Fig. 8- Figure supplement 1

Supplement: supp [file elife-65412-supp-v1.zip]

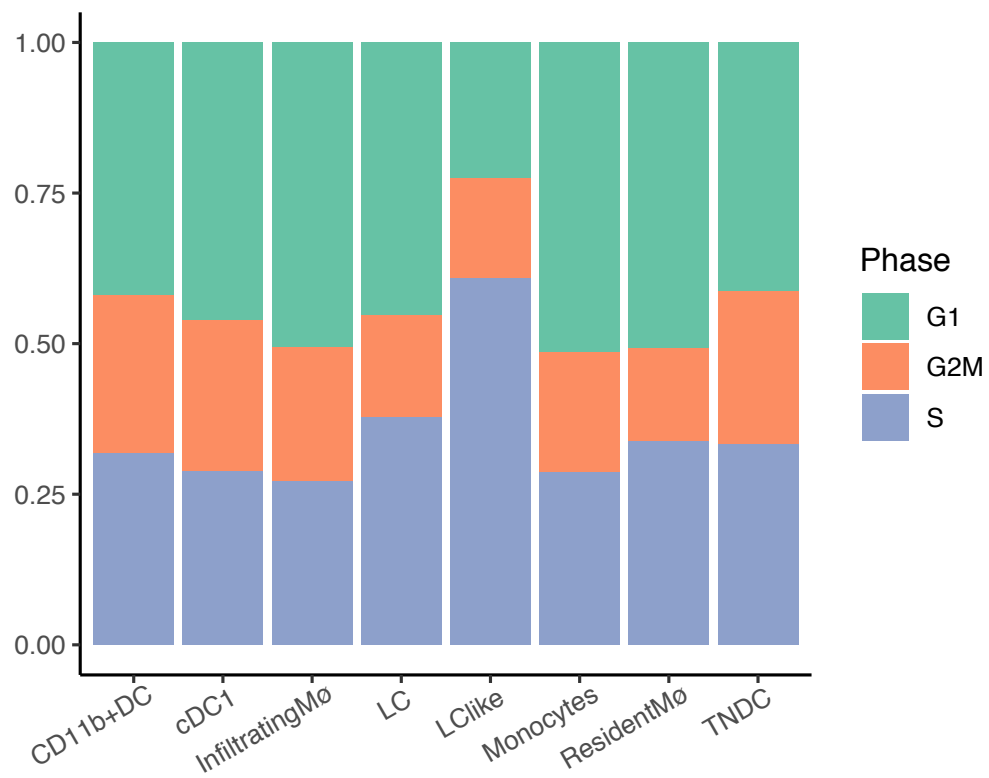

Fig. 6 – Figure supplement 1

Supplement: supp [file elife-65412-supp-v1.zip]

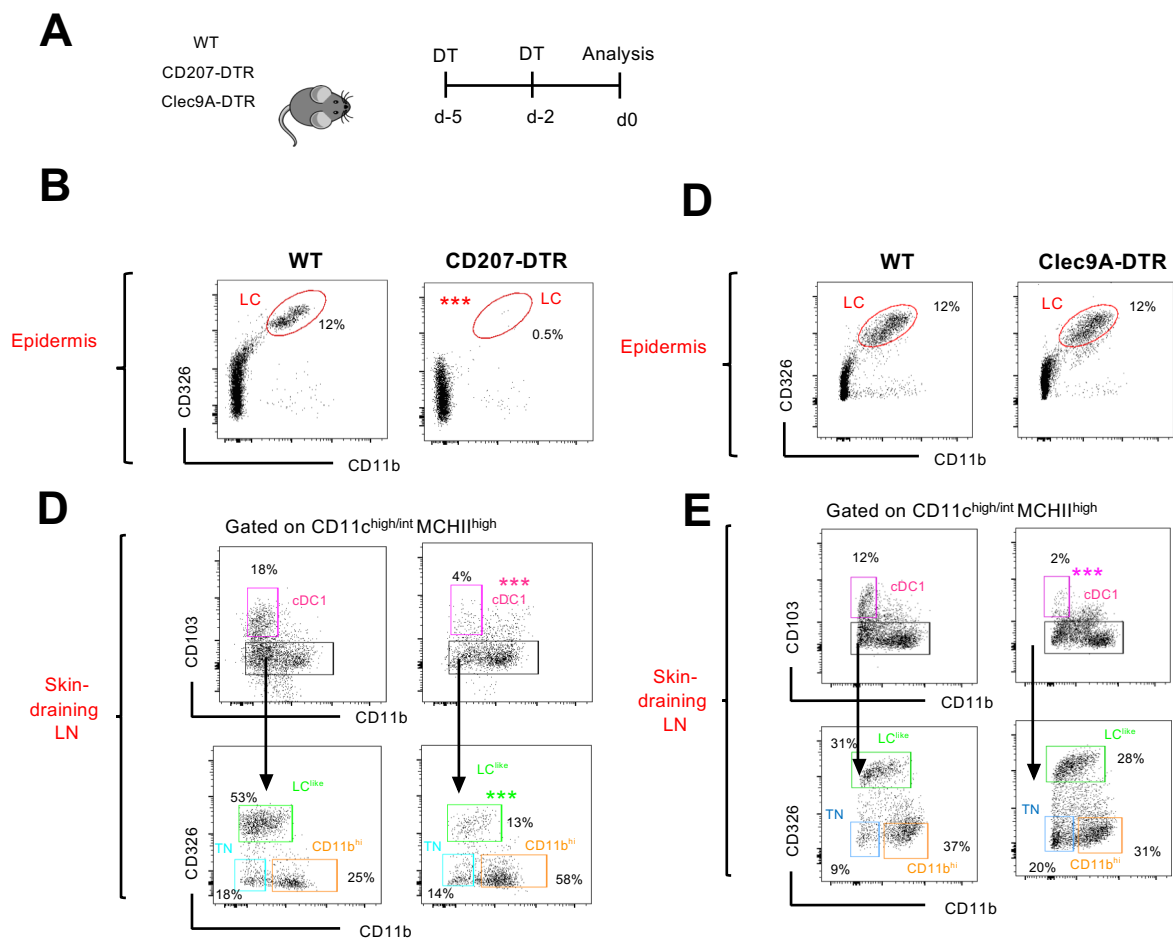

Fig. 8- Figure supplement 2

Supplement: supp [file elife-65412-supp-v1.zip]

**A**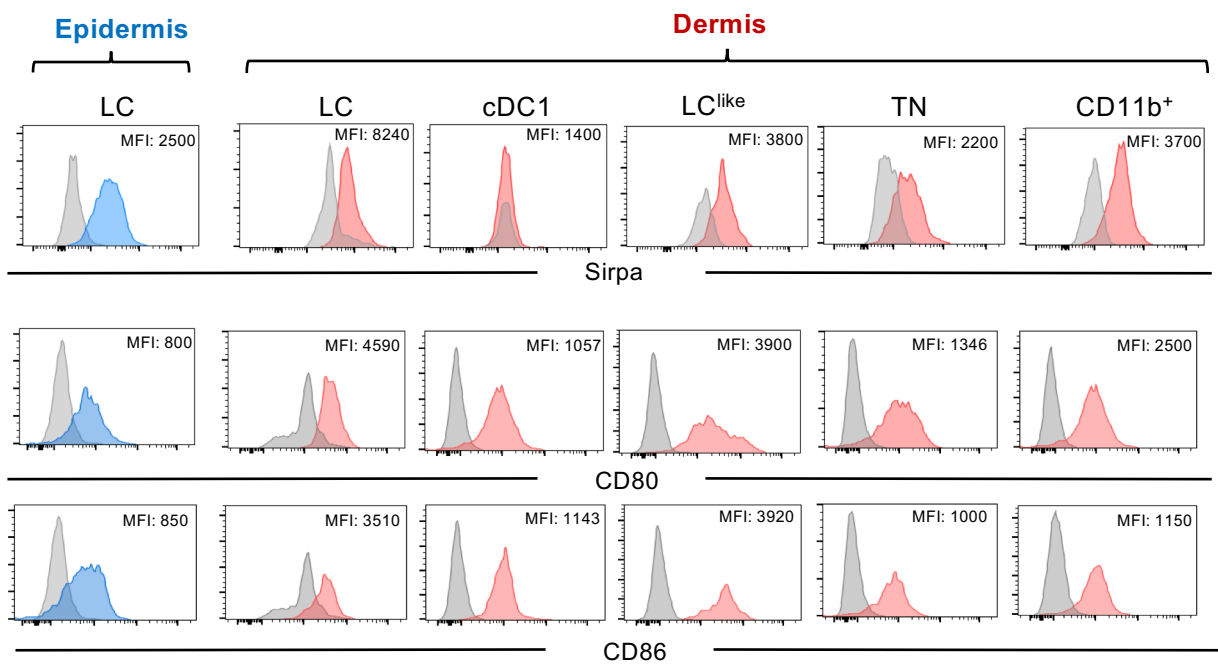**B**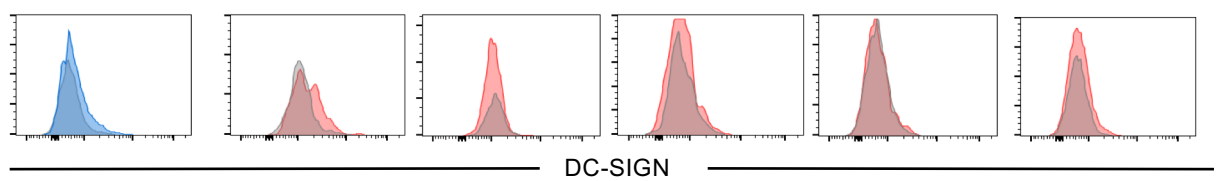

Fig. 1 – Figure supplement 1

Supplement: supp [file elife-65412-supp-v1.zip]

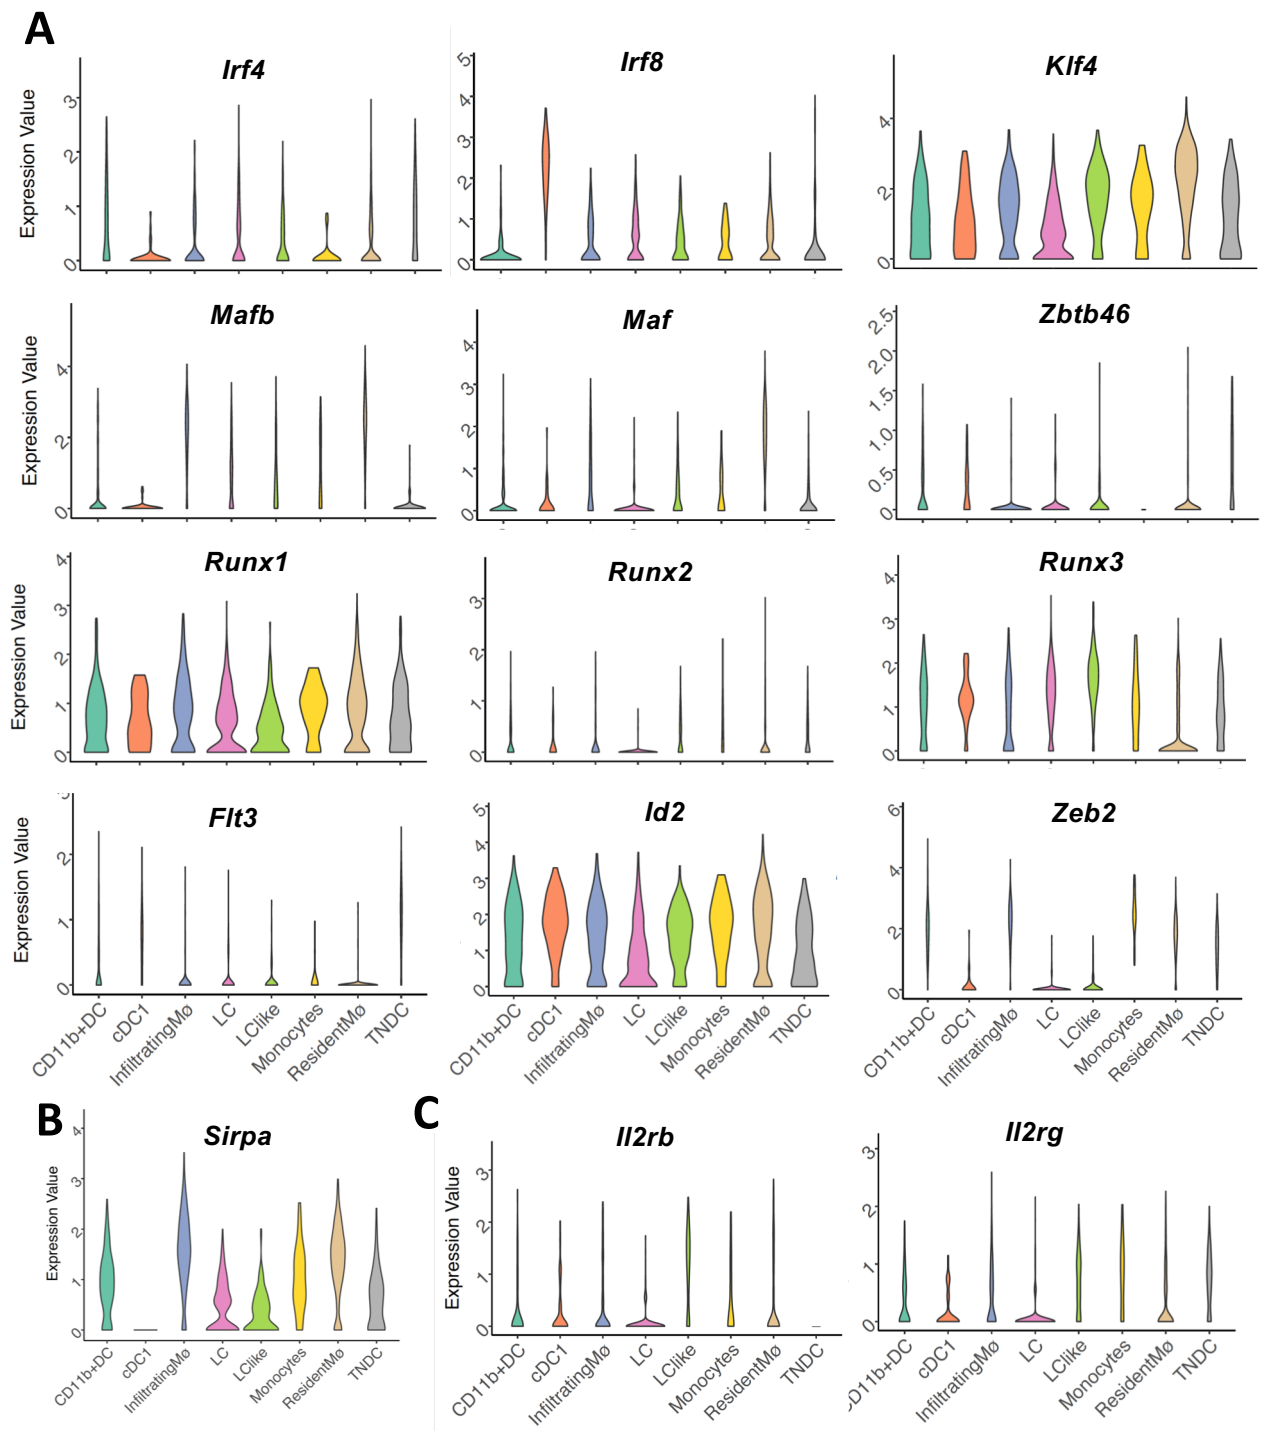

Fig. 3 – Figure supplement 1

Supplement: supp [file elife-65412-supp-v1.zip]

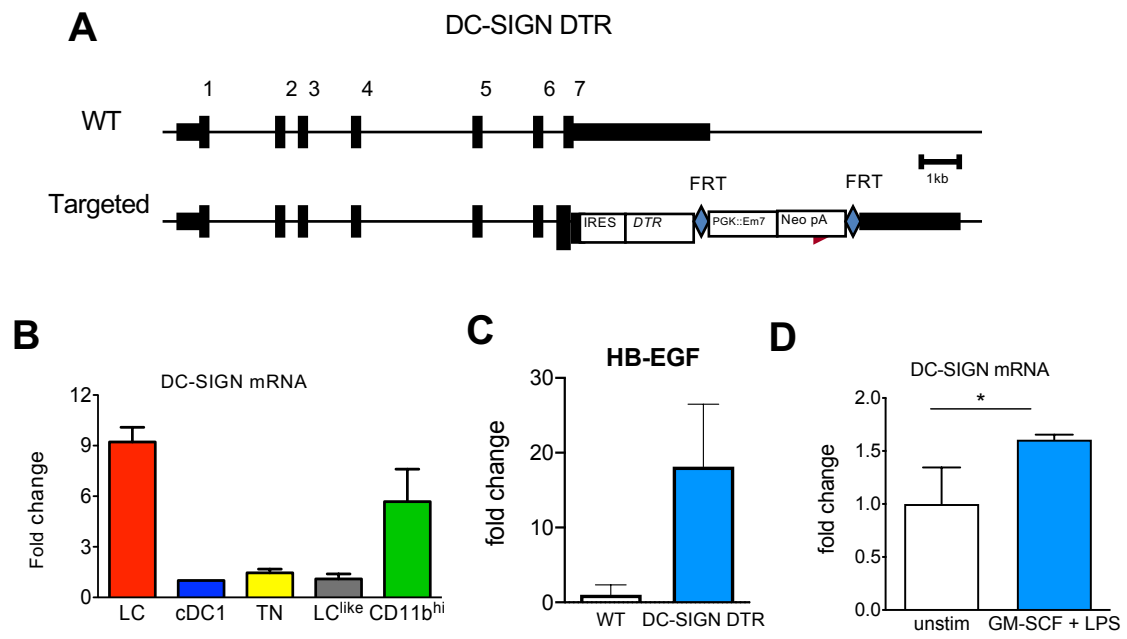

Fig. 7- figure supplement 1

Supplement: supp [file elife-65412-supp-v1.zip]
